# Supplementary material
Source: Research Square preprint supplement (doi:10.21203/rs.3.rs-9317277/v1)
Supplement: Supplementary file 1 [file 35271ddb22b781e6ebe24cd3.docx]

**Coding Scheme for Manuscript: Why are doctoral students kept silent？- An Analysis Based on Chinese Cultural Perspectives**

**Indexing (Coding by Research Protocol)**

Doctoral student silence

Supervisor-student conflict

Chinese cultural perspective

Respecting teachers and valuing education

Face and favor culture

Harmony concept

Endurance/tolerance culture

Supervisor authority

Academic resources

Doctoral graduation

Supervisor-student power gap

Supervisor responsibility system

Supervisor veto system

Academic hegemony

Interpersonal reciprocity

Face preservation

False harmony

Superficial harmony

Conflict avoidance

Goal-driven endurance

Role status cognition

Doctoral research experience

Supervision quality

Doctoral training

Implicit supervisor-student conflict

Explicit supervisor-student conflict

**Thematic Coding (Bottom-up Coding)**

**1. Core Phenomenon**

Doctoral student silence

Implicit supervisor-student conflict

Covert supervisory tension

Superficial supervisor-student harmony

Conflict escalation risk

**2. Cultural Factors (Core Theme)**

**Respecting Teachers and Valuing Education**

Teacher authority worship

Hierarchical teacher-student relationship

Moral stigmatization fear

Academic resource dependence

Supervisor authority abuse

Obedience to academic superiors

**Face and Favor**

Interpersonal reciprocity

Favor exchange

Face preservation (self/supervisor)

Social dignity maintenance

Relationship-based interaction

Transactional supervisor-student relationship

**Harmony Concept**

Conflict avoidance

Collective interest priority

False harmony

Superficial cooperation

Fear of open confrontation

**Endurance**

Goal-driven self-restraint

Graduation goal priority

Role status cognition

Hierarchy adaptation

Temporary conflict coping

Stress tolerance

**3. Academic System & Institutional Factors**

Supervisor responsibility system

Supervisor veto system

Authorship injustice

Research topic control

Academic resource allocation

Graduation signature control

**4. Supervisor Behaviors**

Academic guidance absence

Miscellaneous work assignment

Experimental design error

Feedback delay

Authority display

Academic misconduct

Exploitative behavior

**5. Doctoral Student Behaviors & Reactions**

Silence as survival strategy

Private complaint

Forbearance/avoidance

Compliance with unfair arrangements

Dare not question

Indirect resistance

Emotional suppression

**6. Impacts & Consequences**

Doctoral student mental health

Academic freedom restriction

Research progress delay

Career development concern

Marginalization risk

Doctoral dropout risk
