# Supplementary material
Source: Research Square preprint supplement (doi:10.21203/rs.3.rs-9317277/v1)
Supplement: Supplementary file 2 [file bf966c5c58088819c8edc9c6.docx]

Interview Outline

1.Could you describe your typical communication pattern with your supervisor? (e.g., frequency, formality, topics)

2.In your opinion, what are the key expectations a supervisor holds for a doctoral student, and vice versa?

3.Have you ever been in a situation where you disagreed with your supervisor's opinion, feedback, or request? Can you describe it?

4.In the situation you just described, what was your actual response or action? What were the considerations behind your choice?

5.In academic settings (like group meetings, seminars), how do you usually express your ideas, especially if they differ from your supervisor's?

6.How important do you think maintaining a harmonious relationship with your supervisor is for your academic progress and personal well-being?

7.Can you share an instance where you felt you had to tolerate or endure something in your interaction with your supervisor? What was the outcome?

8.What factors, in your view, most significantly influence a doctoral student's willingness to speak up or challenge their supervisor?

9.Looking back, if you could offer advice to a new PhD student about managing the relationship with their supervisor, what would it be?
